# Supplementary material for: Cannabinoid Receptor 2 Blockade Prevents Anti-Depressive-like Effect of Cannabidiol Acid Methyl Ester in Female WKY Rats
Source: MDPI journal article supplement (doi:10.3390/ijms24043828), 2023-02-14
Supplement: s1 [file s1]

### Corticosterone blood level

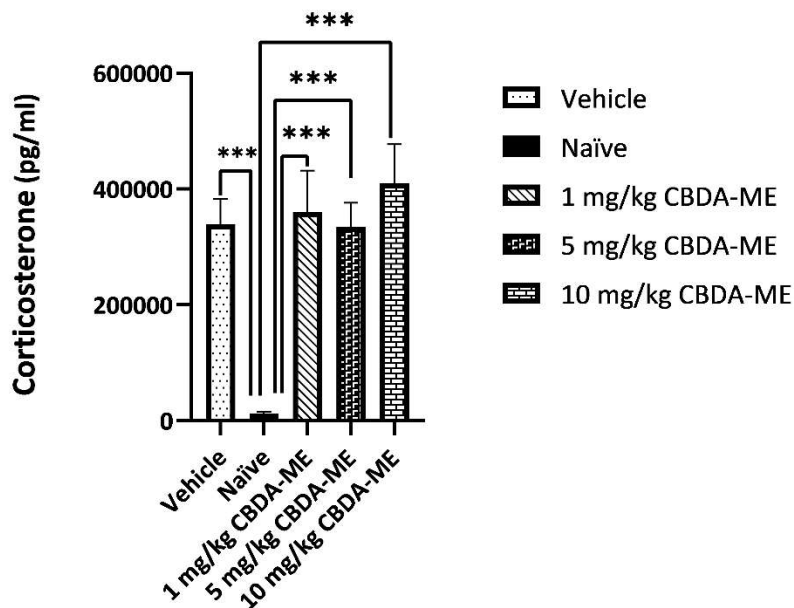

**Figure S1:** Corticosterone blood levels (mean + SEM) of female WKY rats. Rats ingested either vehicle (n = 12) or 1 mg/kg CBDA-ME (n = 12), 5 mg/kg CBDA-ME (n = 12), 10 mg/kg CBDA-ME (n = 12), Naïve (n = 12). \*\*\* p < .0001.

**Table S1:** Cytokines blood levels (mean ± SD) of female WKY rats (n = 8 in each group) that received different oral doses (0, 1, 5, 10 mg/kg) of CBDA-ME and naïve rats.

|                            | IFN<br>gamma           | IL-1 b              | IL-2                 | IL-6                   | IL-10                 | TNF a                 |
|----------------------------|------------------------|---------------------|----------------------|------------------------|-----------------------|-----------------------|
| Naïve                      | 1914.875<br>(144.345)  | 46.6262<br>(3.8675) | 100.24<br>(53.9101)  | 418.51875<br>(16.500)  | 89.35625<br>(7.89212) | 557.6362<br>(25.3899) |
| Vehicle                    | 1806.375<br>(185.350)  | 47.7475<br>(2.5938) | 76.53625<br>(3.9036) | 414.64125<br>(18.1051) | 88.74125<br>(3.5538)  | 550.4475<br>(4.4923)  |
| 1<br>mg/kg<br>CBDA-<br>ME  | 1667.625<br>(203.899)  | 47.27<br>(1.5298)   | 75.755<br>(4.5744)   | 403.0025<br>(17.89042) | 89.52875<br>(3.71367) | 563.0562<br>(21.6646) |
| 5<br>mg/kg<br>CBDA-<br>ME  | 1733.875<br>(241.1919) | 46.95<br>(2.0238)   | 75.64625<br>(3.539)  | 406.4125<br>(13.76346) | 88.06375<br>(6.1604)  | 551.0875<br>(10.7425) |
| 10<br>mg/kg<br>CBDA-<br>ME | 1697.75<br>(230.906)   | 46.79<br>(0.82031)  | 75.98<br>(3.03109)   | 406.405<br>(16.09276)  | 89.40375<br>(2.3618)  | 552.455<br>(7.6266)   |

**Table S2:** FST data (mean  $\pm$  SD) of male WKY rats (n=12–13 in each group) in different treatment groups (0, 1 mg/kg CBDA-ME, 1 mg/kg AM251 + 1 mg/kg CBDA-ME, 1 mg/kg AM630 + 1 mg/kg CBDA-ME, 30 mg/kg imipramine).

|                                      | Floating             | Struggling           | Swimming             |
|--------------------------------------|----------------------|----------------------|----------------------|
| <b>Vehicle</b>                       | 218.1818<br>(41.645) | 12.8182<br>(13.702)  | 69.0000<br>(43.575)  |
| <b>1 mg/kg CBDA-ME</b>               | 183.2727<br>(30.414) | 12.9091<br>(10.123)  | 103.8182<br>(22.701) |
| <b>1mg/kg AM251+ 1 mg/kg CBDA-ME</b> | 175.2500<br>(74.896) | 16.2500<br>(14.181)  | 108.5000<br>(67.763) |
| <b>1mg/kg AM630+ 1 mg/kg CBDA-ME</b> | 169.4167<br>(71.828) | 14.1667<br>(16.0954) | 72.1667<br>(65.7196) |
| <b>30 mg/kg imipramine</b>           | 231.5455<br>(50.301) | 18.5000<br>(12.760)  | 112.0833<br>(63.950) |

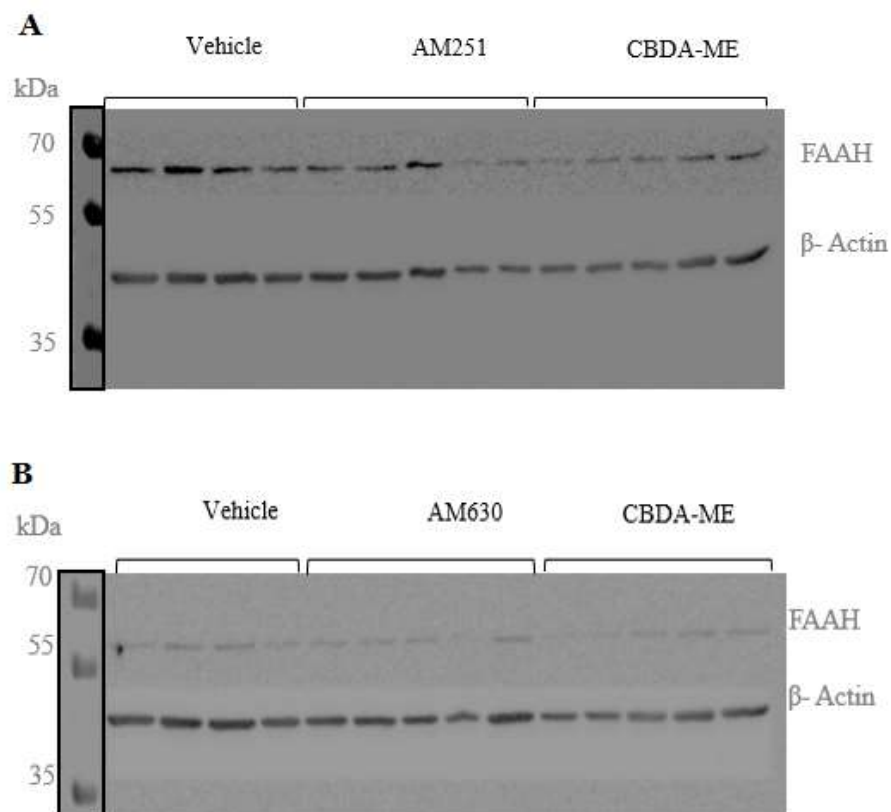

**Figure S2:** FAAH expression in the hippocampus of female WKY rats, images by western blot. Rats received either (A) vehicle (n=4), 5mg/kg CBDA-ME (n=5), or 1mg/kg AM251 + 5 mg/kg CBDA-ME (n=5); (B) vehicle (n=4), 5mg/kg CBDA-ME (n=5), or 1mg/kg AM630 + 5 mg/kg CBDA-ME (n=5).
